# Supplementary material for: Advanced materials earliest assessment (AMEA)
Source: Royal Society of Chemistry journal article supplement (doi:10.1039/d3en00831b), 2024-01-01
Supplement: d3en00831b1.pdf [file d3en00831b1.pdf]

## Advanced Materials Earliest Assessment (AMEA)

Wendel Wohlleben<sup>1</sup> Michael Persson<sup>2</sup>, Blanca Suarez-Merino<sup>3</sup>, Anders Baun<sup>4</sup>, Veronica Di Battista<sup>1,4</sup>, Susan Dekkers<sup>5</sup>, Eugene van Someren<sup>5</sup>, Dirk Broßell<sup>6</sup>, Burkhard Stahlmecke<sup>7</sup>, Martin Wiemann<sup>8</sup>, Otmar Schmid<sup>9</sup>, Andrea Haase<sup>10</sup>

<sup>1</sup>BASF SE, Carl-Bosch-Str. 38, 67056 Ludwigshafen, Germany

<sup>2</sup>Chalmers CIT, Chalmers Industriteknik, Sven Hultins Plats 1, 412 58 Göteborg, Sweden

<sup>3</sup>TEMAS Solutions GmbH, Lätteweg 5, 5212 Hausen, Switzerland

<sup>4</sup>DTU Sustain, Technical University of Denmark, Building 115, 2800 Kgs. Lyngby, Denmark

<sup>5</sup>TNO, Risk Analysis for Products in Development, The Netherlands

<sup>6</sup>Federal Institute for Occupational Safety and Health, Nöldnerstr. 40-42, 10317 Berlin, Germany

<sup>7</sup>Institut für Umwelt & Energie, Technik & Analytik e. V., Bliersheimer Str. 58-60, 47229 Duisburg, Germany

<sup>8</sup>IBE R&D Institute for Lung Health gGmbH, Münster, Germany

<sup>9</sup>Helmholtz Zentrum München, Ingolstädter Landstr. 1, 85764 Neuherberg, Germany

<sup>10</sup>German Federal Institute for Risk Assessment (BfR), Department of Chemical and Product Safety

E-mail contact: [wendel.wohlleben@basf.com](mailto:wendel.wohlleben@basf.com)

## SUPPORTING INFORMATION

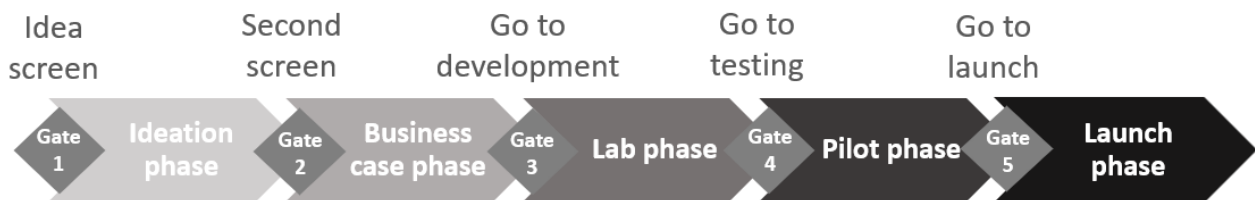

**Figure SI\_1:** Portfolio management of innovation projects by the StageGate<sup>1</sup> process. Each gate serves as filter: The available innovation budget is thus assigned the most promising projects, whereas the majority of projects is stopped.

Additional background on section 2.2 “Data requirements for early phases of StageGate”:

The best practice in industry integrates criteria of safety and sustainability into the decisions to be made at each gate (Figure SI\_1).<sup>2</sup> Technology readiness level (TRL) scale was originally defined by NASA as “a type of measurement system used to assess the maturity level of a particular technology. TRL scale uses the parameter that evaluates the maturity of a technology according to a series of indicators that go from 1 (the basic principles are documented) to 9 (the technology is released, and industrial production is started”.<sup>3</sup> The TRL scale was introduced in EU funded projects in 2012 and is currently the point of reference for determining the development or maturity of a research and its readiness for the market uptake and potential investments.<sup>4</sup> The initial TRL at ideation phase is typically 1 to 3, but may also be higher for incremental innovation. At the end of the lab phase phase, the TRL should have reached 5 to 6. By definition, a market launch (Figure SI\_1) constitutes TRL 7 to 8.<sup>4</sup> At each gate, also the dimensions of the technical probability of success, the probability of commercial success, the raw materials sourcing, and the overall dimension of socio-economic assessment are typically supported by company-specific tiered tools, and in order to avoid overlap with existing tools, these dimensions are beyond scope of AMEA.

Considering that sustainability assessment is comparative in nature (and not absolute), the scarcity of data at low TRL plays a major role in the feasibility of any assessment framework. Data scarcity generally relates to one of the three following situations:

- A. No data can be provided for a certain data requirement, because it is not technically possible at this innovation stage (e.g. due to an inadequately defined production process), or because the resources to gather the data would consume an inappropriate share of the R&D budget that can be sustained by the expected commercial value (ECV)<sup>5</sup> of the targeted product, application and region (P-A-R).<sup>6</sup>
- B. Generic data was derived from sector-specific knowledge, or from grouping and read-across. This assigns - for a certain endpoint - *one* value to *all* versions of the AdMa, and allows an evaluation of the importance of certain SSbD dimensions, e.g. mapping against planetary boundaries,<sup>7</sup> and possibly a prioritization of testing in the next phase. However, this assessment cannot discriminate between AdMa versions, and thus provides no design target.
- C. Specific data was measured or gathered for each specific version of the AdMa, and also for a corresponding CoMa. This allows to differentiate versions of the AdMa against each other and against the CoMa benchmark. This assessment will directly provide valuable design targets for the next iterations of the AdMa during R&D.

By selecting only the most relevant assessments at early innovation stages (Table 1, Figure 2), AMEA strives to build the assessment on C) specific data for each version of the AdMa.

**Table SI\_1:** Case studies to exemplify the categorization by AMEA dimensions

| <b>Material</b>                          | <b>Material consists of particles, or contains particles, or none thereof?</b>                | <b>Material is a nanomaterial or nano-enabled, or none thereof?</b>                                                                                                                                                                                                      | <b>Materials is conventional or advanced?</b>                                                                                                                                                                                                                                                          |
|------------------------------------------|-----------------------------------------------------------------------------------------------|--------------------------------------------------------------------------------------------------------------------------------------------------------------------------------------------------------------------------------------------------------------------------|--------------------------------------------------------------------------------------------------------------------------------------------------------------------------------------------------------------------------------------------------------------------------------------------------------|
| Perovskite-oxides for exhaust catalysts  | Consists of particles.<br>Final application (in specific case: catalyst) contains particles.  | Nano-enabled, but no nanomaterial:<br><br>Median size is above the applicable regional (EU) regulatory definition, but performance depends on large surface                                                                                                              | Advanced: rational design for qualitatively new functional performance of oxygen storage capacity <i>and</i> catalytic activity                                                                                                                                                                        |
| TiO <sub>2</sub>                         | Consists of particles.<br>Final application (e.g. paint or cosmetics) contains particles.     | Some grades are nanomaterials (Fig. SI_2).<br><br>Some grades are no nanomaterials.                                                                                                                                                                                      | TiO <sub>2</sub> pigments (non-nano) and UV filters (nano) fulfill all CoMa indicators (Fig. 1).<br><br>TiO <sub>2</sub> nanofibers and nanocubes are AdMa, due to targeted inherent structural features (Fig. SI_2) and rational design for other functional uses than pigments.                      |
| Quantum Dots                             | Consists of particles.<br>Final application (in specific case: TV screen) contains particles. | Nanomaterial                                                                                                                                                                                                                                                             | Borderline: known since more than a decade, but the structural design of the specific case <sup>8</sup> is complex and large-scale commercial use is still recent and limited to few suppliers                                                                                                         |
| Aerogel-fiber mats for façade insulation | Does not consist of particles, does not contain particles.                                    | Nano-enabled, but no nanomaterial:<br><br>Pore size is nanoscale, but internally porous materials are out of scope of the applicable regional (EU) regulatory definition.<br><br>The enhanced thermal insulation (Knudsen effect) depends on nanopores. <sup>9, 10</sup> | Borderline. Inherent structural features are very different from CoMa (mineral wool or polymer foams), and the >10% enhanced performance is significant, but there are several established producers. However, market penetration is still limited to higher-cost niche applications. <sup>11-13</sup> |

## Details on the exemplary IATA-based hazard screening of CoMa and AdMa forms of TiO<sub>2</sub>

The scope of the case study as explained in section 2.4 includes TiO<sub>2</sub> as white pigment and also nanoforms of TiO<sub>2</sub> serving as UV filter in transparent sunscreens, and finally also TiO<sub>2</sub> nanofibers and nanocubes with targeted structural features (Figure SI\_2). Only the comparative hazard screening by new approach methods (NAM) as recommended by Table 1, specifically in chemico NAMs and in vitro NAMs, shall be exemplified in the following.

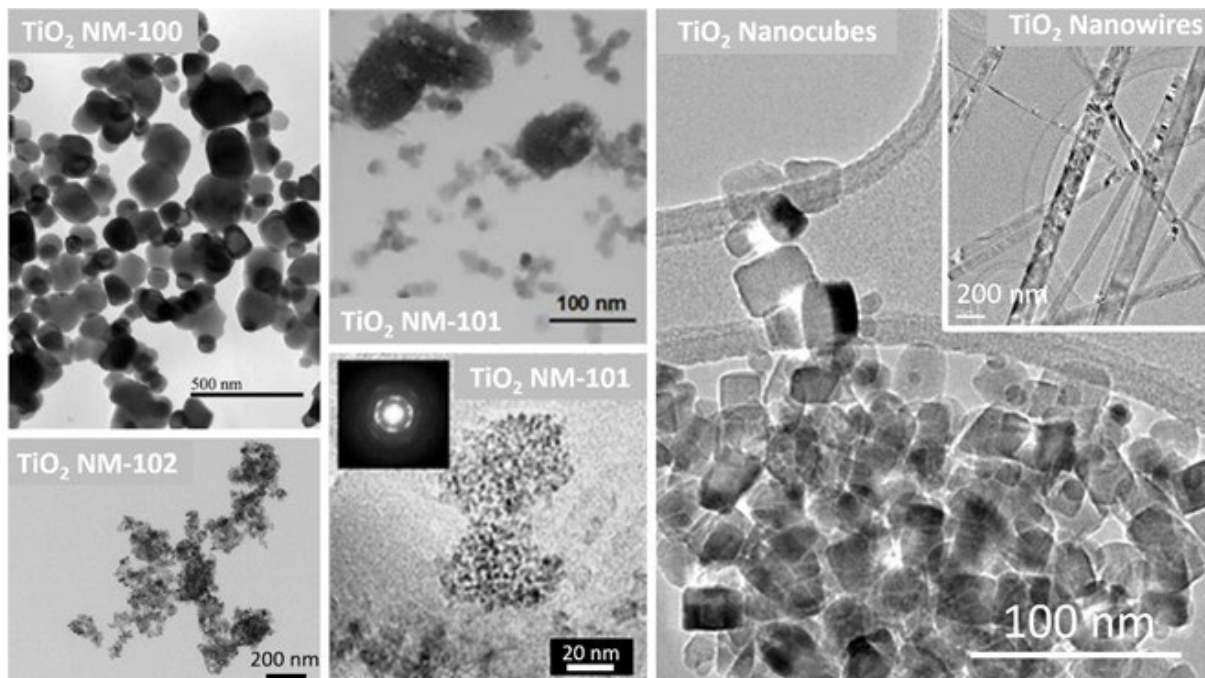

**Figure SI\_2** CoMa and AdMa forms of TiO<sub>2</sub> and results of their hazard screening a) Electron microscopic imaging shows qualitatively similar CoMa forms (NM-100, NM-101, NM-102) and targeted structural features of AdMa (nanocubes, nanowires). Partially reproduced from the JRC Report on TiO<sub>2</sub> nanomaterials;<sup>14</sup> image of the TiO<sub>2</sub> nanocubes was provided by [Polona.umek@ijs.si](mailto:Polona.umek@ijs.si), image of TiO<sub>2</sub> nanowires was taken from the manufacturers website (<http://www.novarials.com/ProductsTiONWsA.html>, accessed 17.1.2022).

A suitable IATA exists and recommends testing of biodissolution, surface reactivity and in vitro macrophage interaction<sup>15, 16</sup>. Methods were applied as recommended by the IATA, and published earlier.<sup>15, 17</sup> By their composition and structure, all materials were within the applicability domain of the assays recommended by the IATA.

Nanowires were compared in two grades of purity: The industrial grade (IG) fibers differed from the research-grade (RG) fibers by a significantly higher dissolution rate (Table SI\_2). This may also be related to Ti-containing impurities. The AdMa RG fiber, the AdMa cubes and two CoMa particle benchmarks (both from JRC) shared a very similar reactivity in surface dose metrics (Table SI\_2). Measurements were performed in the dark, without UV activation. Differences in the mass-dose reactivity were within a factor 3, which is a cutoff for sufficient similarity in the ECETOC NanoApp, supporting the joint registration of different nanoforms<sup>18, 19</sup>. Accordingly, the differences between AdMa and CoMa in that range may also not be relevant for SSbD decisions.

The TiO<sub>2</sub>\_fibre RG, the cubes and two particle benchmarks (both from JRC) also shared a very slow dissolution rate (Table SI\_2). Differences in the dissolution behavior were metrologically significant, but not biologically significant by the GRACIOUS criteria of similarity<sup>17, 20, 21</sup>. By the standardised detection of radical generation via electron paramagnetic resonance,<sup>22</sup> no significant reactivity was found on the TiO<sub>2</sub> fibers (data not shown), but reactivity of the JRC particles was significant and in similar ranges up to 3-fold above water blank<sup>23</sup>. The different shapes also differed in the specific surface area, necessitating a comparison both in mass metrics and in surface metrics. The surface metrics was proposed as more relevant to identify similar reaction mechanisms, i.e. qualitative similarity. The scaling with BET may then be used to justify a category with systematic trends between the better-known CoMa and the AdMa.<sup>15</sup>

**Table SI\_2** Results on both CoMa and AdMa forms of TiO<sub>2</sub> by IATA-based comparison of the extrinsic properties of reactivity and dissolution rate (in chemico NAM):

RG: research grade. IG: Industry grade; n.d.: not determined

| Material                      | Shape    | BET<br>m <sup>2</sup> /g | Reactivity<br>sBOD<br>nmol TEU/m <sup>2</sup> | Dissolution<br>rate<br>ng/cm <sup>2</sup> /h | Reactivity<br>mBOD<br>nmol TEU/mg | Dissolution<br>halftime<br>Days |
|-------------------------------|----------|--------------------------|-----------------------------------------------|----------------------------------------------|-----------------------------------|---------------------------------|
|                               |          |                          | Surface dose metrics                          |                                              | Mass dose metrics                 |                                 |
| TiO <sub>2</sub> _fibre<br>RG | Fibre    | 9.46                     | 4 ± 1                                         | 0.15 ± 0.023                                 | 0.04 ± 0.01                       | >2000                           |
| TiO <sub>2</sub> _fibre<br>IG | Fibre    | 9.46                     | 0 ± 3                                         | 1.08 ± 0.046                                 | 0 ± 0.03                          | 282                             |
| TiO <sub>2</sub> _cube        | Cube     | 88.18                    | 8.5 ± 1.9                                     | 0.004 ±<br>0.001                             | 0.4 ± 0.09                        | >2000                           |
| TiO <sub>2</sub><br>NM105     | Particle | 51                       | 13 ± 0                                        | 0.046 ±<br>0.005                             | 0.6 ± 0.02                        | >1000                           |
| TiO <sub>2</sub><br>NM102     | Particle | 80                       | 8 ± 0.1                                       | n.d.                                         | 0.6 ± 0.02                        | n.d.                            |

Due to the rationale that a close contact is necessary to reveal possible form-dependent effects of nanomaterials, the bioactivity of these TiO<sub>2</sub> varieties was studied with phagocytic cells, namely alveolar macrophages (NR8383 cells) under serum-free conditions. All TiO<sub>2</sub> formed aggregates/agglomerates under cell culture conditions and/or settled to the bottom of the cell culture dish during a standardized exposure period of 16 h. This enabled their quantitative ingestion by a defined number of cell and led to a largely defined cellular burden within the cell collective, such that biological effects of the different TiO<sub>2</sub> qualities became directly comparable. Therefore, we used “mass per volume” as an appropriate dose metric for biologic effects which were reflected by the activity/concentration of lactate dehydrogenase (LDH), glucuronidase (GLU), tumor necrosis factor α (TNFα), and hydrogen peroxide (H<sub>2</sub>O<sub>2</sub>) in the cell culture medium. To simplify the evaluation, Figure SI\_2 provides color-coded “in vitro LOAECs” calculated as statistically significant against vehicle-treated controls.

| Name                                             | Size/Shape from TEM Data                                                                                               | BET (m <sup>2</sup> /g) | LOAECs |        |                               |        | Crystal-<br>linity | Shape             |
|--------------------------------------------------|------------------------------------------------------------------------------------------------------------------------|-------------------------|--------|--------|-------------------------------|--------|--------------------|-------------------|
|                                                  |                                                                                                                        |                         | LDH    | GLU    | H <sub>2</sub> O <sub>2</sub> | TNFα   |                    |                   |
| TiO <sub>2</sub> nanowire 100/20<br>(RG)         | Fibers diameter 100nm. Length 20 μm                                                                                    | n.m.                    | Red    | Red    | Red                           | Red    | Anatase            | Fiber             |
| TiO <sub>2</sub> nanowire 100/20<br>(RG) crushed | Fibers diameter 100nm. Length < 10 μm                                                                                  | n.m.                    | Yellow | Green  | Green                         | Yellow |                    |                   |
| TiO <sub>2</sub> nanocubes                       | Aggregates, primary particle size: 10-40 nm (from TEM picture)                                                         | n.m.                    | Green  | Green  | Green                         | Green  | Rutile             | roughly spherical |
| TiO <sub>2</sub> NM-100                          | Aggregates size from 30-700 nm; primary particles: 50-90 nm (JRC Report)                                               | 9.2                     | Yellow | Green  | Green                         | Green  |                    |                   |
| TiO <sub>2</sub> NM-101                          | Aggregates Size from 10-170nm; primary particles: 6 nm (JRC Report)                                                    | 316.1                   | Yellow | Green  | Green                         | Green  |                    |                   |
| TiO <sub>2</sub> NM-102                          | Crystallite < 50 nm. Aggregates 100-500 nm; prim. particles 21 ± 10nm (JRC Report)                                     | 78                      | Yellow | Green  | Green                         | Yellow |                    |                   |
| TiO <sub>2</sub> NM-103                          | Prim. particle size: 20-100nm (small elongated, prismatic), aggregates from 40-400nm (JRC Report)                      | 50.8                    | Yellow | Green  | Green                         | Green  |                    |                   |
| TiO <sub>2</sub> NM-104                          | Primary particle size: 8-200nm, aggregates from 20-500nm (JRC Report)                                                  | 56.3                    | Yellow | Green  | Green                         | Green  |                    |                   |
| TiO <sub>2</sub> NM-105                          | Primary particle size: 10-34nm (small elongated, prismatic; agglomerate/aggregates with fractal structure (JRC Report) | 46.2                    | Red    | Yellow | Red                           | Yellow |                    |                   |

**Figure SI\_3** Bioactivity in a macrophage assay (in vitro NAM), which is recommended by an applicable IATA.<sup>15, 24</sup> Color coding of the in vitro Low Observed Adverse Effect Concentrations (LOAECs) for lactate dehydrogenase (LDH), glucuronidase (GLU), hydrogen peroxide (H<sub>2</sub>O<sub>2</sub>) and tumor necrosis factor α (TNFα)

in [ $\mu\text{g}/\text{mL}$ ]: purple  $\leq 22.5$ , red  $\leq 45$ , orange  $\leq 90$ , yellow  $\leq 180$ , green  $> 180$ . Additional benchmarks of low reactivity (e.g. well-known  $\text{BaSO}_4$  NM220 from JRC repository or corundum dust) and high reactivity (e.g. crystalline quartz) are applicable.<sup>24</sup> n.m.: see Table SI\_2.

With respect to roughly spherical particles (Figure SI\_2), main differences were found between anatase and rutile materials with respect to cytotoxicity (LDH and GLU), with anatase materials being less cytotoxic. Differences between small, medium and large BET surfaces of anatase materials (NM-100, NM-101, NM-102) were hardly found which may be due to the overall low activity and to a more or less uniform formation of agglomerates, visible at the bottom of the cell culture vessels (data not shown).  $\text{TiO}_2$  nanocubes, despite their sharper edges (see Figure SI\_2), exhibited no apparent bioactivity. Again, this material exhibited some degree of aggregation under cell culture conditions.

In contrast, the  $\text{TiO}_2$  nanowires elicited pronounced effects in NR8383 cells and increased all four parameters at low concentrations (Figure SI\_2). Because the length of this rigid fibers outscored the diameter of NR8383 macrophages (12-15  $\mu\text{m}$ ) frustrated phagocytosis was frequently seen to occur. This finding may provide the main SSbD design recommendation. Unfortunately the only available fibers by Novarials differed from the other AdMa and from the CoMa also by crystallinity, specified by the manufacturer as "The wetcake form of  $\text{TiO}_2$  nanowires are in the form of  $\text{H}_2\text{TiO}_3$ , monoclinic crystal phase, it can be changed to anatase upon heating to around 550C." The attribution of differences to either shape or crystallinity thus requires a further control experiment. We prepared crushed  $\text{TiO}_2$  nanowires by extensive mortaring. This led to shortened  $\text{TiO}_2$  nanowire fragments which were taken up completely by the macrophages without eliciting any frustrated phagocytosis. Of note, cytotoxicity (LDH) and  $\text{TNF}\alpha$  formation were reduced by 50-75 %, while the release of glucuronidase and  $\text{H}_2\text{O}_2$  were abolished (Figure SI\_2).

Overall, the comparison of fully ingestible anatase  $\text{TiO}_2$  NMs (spheres vs. cubes vs. crushed fiber fragments) showed that effects on the NR8383 alveolar macrophage model with its 4 parameters LDH, GLU,  $\text{H}_2\text{O}_2$  and  $\text{TNF}\alpha$  were comparatively low.

In contrast, the pronounced effects of the rigid  $\text{TiO}_2$  nanofibers were attributable to their elongated form and not to crystallinity or other differences, as shown by experiments with crushed  $\text{TiO}_2$  nanofibers. It may be suspected that there is a length-dependent increase in bioactivity and/or even a length-dependent threshold value, based on the discrepancy of fiber length and cell size.

In summary, the results confirmed pronounced effects of the rigid  $\text{TiO}_2$  nanofiber AdMa and attributed them to the fiber shape. This finding alone does not necessarily exclude this part of the SSbD design space from further development, but the SSbD weighing of the dimension of occupational safety against the dimension of benefits during use would require important benefits for this material to be more sustainable than alternatives, and would still necessitate risk management measures. In contrast, the effects were not attributed to the crystallinity, thus leaving the SSbD design space open for crystallinity.

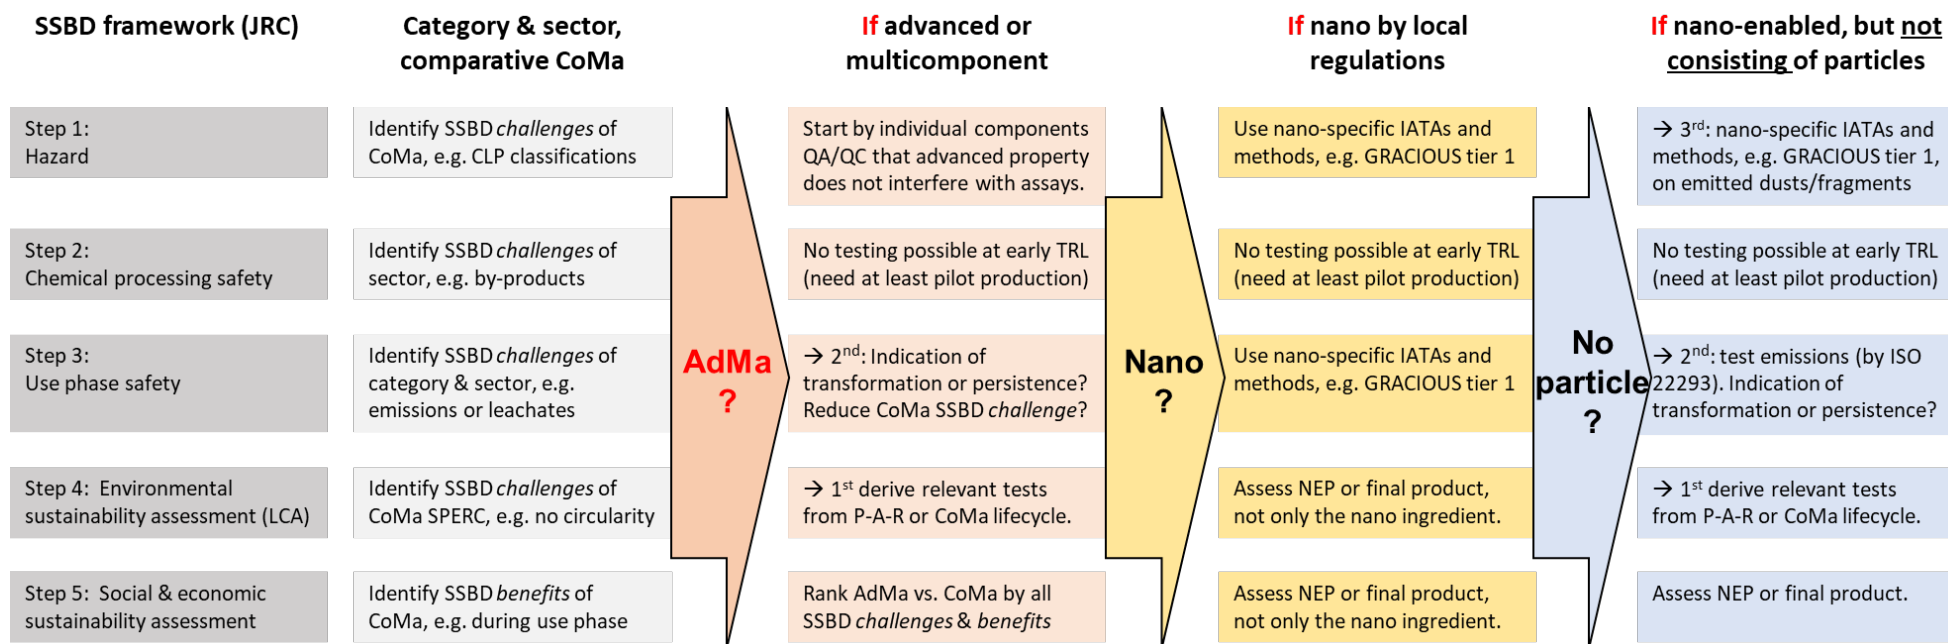

**Figure SI\_4:** Mapping of elements of the AMEA guidance in Table 1 to the five “steps” of JRC’s draft SSbD framework, focusing exclusively on low-TRL screenings in the ideation phase, business case phase, and lab phase. The implications of identification as advanced, multicomponent, nano or nano-enabled by AMEA are cumulative: a material that is AdMa and nano-enabled triggers both of the requirements or recommendations. As a result of the mapping, the numberings 1<sup>st</sup>, 2<sup>nd</sup>, 3<sup>rd</sup> indicate a logical order of steps that is flexibly adjusted to the case by the AMEA, and is thus often different from the fixed order of steps in the JRC draft SSbD framework.



## References in SI:

- (1) Cooper, R. G. Stage-gate systems: a new tool for managing new products. *Business horizons* **1990**, 33 (3), 44-54.
- (2) ISO. 21505 Project, programme and portfolio management - guidance on governance. **2017**.
- (3) NASA. Technology Readiness Levels, can be found at: [https://www.nasa.gov/wp-content/uploads/2017/12/458490main\\_trl\\_definitions.pdf?emrc=da53fb](https://www.nasa.gov/wp-content/uploads/2017/12/458490main_trl_definitions.pdf?emrc=da53fb).
- (4) European Commission. ABOUT TECHNOLOGY READINESS LEVELS: Why using TRLs? can be found at: <https://euraxess.ec.europa.eu/career-development/researchers/manual-scientific-entrepreneurship/major-steps/trl>. **2012**.
- (5) ACCOUNTING\_CPE\_COURSES&BOOKS. R&D funding decisions, can be accessed at: <https://www.accountingtools.com/articles/rd-funding-decisions>. **2023**.
- (6) WBCSD. World Business Council for Sustainable Development: Portfolio Sustainability Assessment v2.0, can be accessed at <https://www.wbcd.org/Programs/Circular-Economy/Resources/Portfolio-Sustainability-Assessment-v2.0>. **2023**, 1-54.
- (7) Persson, L.; Carney Almroth, B. M.; Collins, C. D.; Cornell, S.; de Wit, C. A.; Diamond, M. L.; Fantke, P.; Hassellöv, M.; MacLeod, M.; Ryberg, M. W.; et al. Outside the Safe Operating Space of the Planetary Boundary for Novel Entities. *Environmental Science & Technology* **2022**, 56 (3), 1510-1521. DOI: 10.1021/acs.est.1c04158.
- (8) Di Battista, V.; Sanchez-Lievanos, K. R.; Jeliaskova, N.; Murphy, F.; Tsiliki, G.; Zabeo, A.; Gajewicz-Skretna, A.; Mikołajczyk, A.; Hristozov, D.; Stone, V.; et al. Similarity of multicomponent nanomaterials in a safer-by-design context: the case of core-shell quantum dots. *Environmental Science: Nano* **2024**, 11, 924-941.
- (9) Mazrouei-Sebdani, Z.; Naeimirad, M.; Peterek, S.; Begum, H.; Galmarini, S.; Pursche, F.; Baskin, E.; Zhao, S.; Gries, T.; Malfait, W. J. Multiple assembly strategies for silica aerogel-fiber combinations—a review. *Materials & Design* **2022**, 111228.
- (10) Keller, J. G.; Wiemann, M.; Groeters, S.; Werle, K.; Vennemann, A.; Landsiedel, R.; Wohlleben, W. Aerogels are not regulated as nanomaterials, but can be assessed by tiered testing and grouping strategies for nanomaterials. *Nanoscale Advances* **2021**, 3 (13), 3881-38893.
- (11) Polaris\_Market\_Research. *Aerogel Market Share, Size, Trends, Industry Analysis Report, By Product (Silica, Polymers, Carbon, Others); By Form; By Technology; By End-Use; By Region; Segment Forecast, 2022 - 2030*, can be found under <https://www.polarismarketresearch.com/industry-analysis/aerogel-market>; 2022.
- (12) IndustryARC. *Aerogel Market - Forecast(2023 - 2028)*, it can be found under <https://www.industryarc.com/Report/15381/aerogels-market.html>; 2022.
- (13) research, P. m. *Aerogel Market Share, Size, Trends, Industry Analysis Report, By Product (Silica, Polymers, Carbon, Others); By Form; By Technology; By End-Use; By Region; Segment Forecast, 2022 - 2030*, can be found under <https://www.polarismarketresearch.com/industry-analysis/aerogel-market>; 2022.
- (14) Rasmussen K, Mast J, De Temmerman PJ, Verleysen E, Waegeneers N, van Steen F, Pizzolon JC, De Temmerman L, van Doren E, Alstrup Jensen K, Birkedal R, Levin M, Hjortkjær Nielsen S, Kalevi Koponen I, Clausen PA, Kofoed-Sørensen V, Kembouche Y, Thieriet N, Spalla O, Guiot C, Rousset D, Witschger O, Bau S, Bianchi B, Motzkus C, Shivachev B, Dimowa L, Nikolova R, Nihtianova D, Tarassov M, Petrov O, Bakardjieva S, Gilliland D, Pianella F, Ceccone G, Spampinato V, Cotogno G, Gibson N, Gaillard C, Mech A. Titanium dioxide NM-100, NM-101, NM-102, NM-103, NM-104, NM-105: Characterisation and physico-chemical properties. JRC repository: NM-series of representative manufactured nanomaterials. JRC Science and Policy Report, EUR 26637 EN, 2014.
- (15) Braakhuis, H. M.; Murphy, F.; Ma-Hock, L.; Dekkers, S.; Keller, J.; Oomen, A. G.; Stone, V. An Integrated Approach to Testing and Assessment to Support Grouping and Read-Across of Nanomaterials After Inhalation Exposure. *Appl. In Vitro Toxicol.* **2021**, 7, 112-128.
- (16) Murphy, F.; Dekkers, S.; Braakhuis, H.; Ma-Hock, L.; Johnston, H.; Janer, G.; di Cristo, L.; Sabella, S.; Jacobsen, N. R.; Oomen, A. G. An integrated approach to testing and assessment of high aspect ratio nanomaterials and its application for grouping based on a common mesothelioma hazard. *NanoImpact* **2021**, 22, 100314.
- (17) Jeliaskova, N.; Bleeker, E.; Cross, R.; Haase, A.; Janer, G.; Peijnenburg, W.; Pink, M.; Rauscher, H.; Svendsen, C.; Tsiliki, G.; et al. How can we justify grouping of nanoforms for hazard assessment? Concepts and tools to quantify similarity. *NanoImpact* **2022**, 25, 100366. DOI: <https://doi.org/10.1016/j.impact.2021.100366>.
- (18) Janer, G.; Landsiedel, R.; Wohlleben, W. Rationale and decision rules behind the ECETOC NanoApp to support registration of sets of similar nanoforms within REACH. *Nanotoxicology* **2021**, 15 (2), 145-166. DOI: 10.1080/17435390.2020.1842933.



- (19) Janer, G.; Ag-Seleci, D.; Sergent, J.-A.; Landsiedel, R.; Wohlleben, W. Creating sets of similar nanoforms with the ECETOC NanoApp: real-life case studies. *Nanotoxicology* **2021**, *15* (8), 1016-1034. DOI: 10.1080/17435390.2021.1946186.
- (20) Jeliakova, N.; Ma-Hock, L.; Janer, G.; Wohlleben, W. Possibilities to group nanomaterials across different substances – a case study on organic pigments. *NanoImpact* **2021**, *under review*.
- (21) Cross, R. Reproducibility of methods required to identify and characterize nanoforms of substances. *NanoImpact* **2021**, *under review*.
- (22) ISO. *Nanotechnologies — Electron spin resonance (ESR) as a method for measuring reactive oxygen species (ROS) generated by metal oxide nanomaterials*. 2017. <https://www.iso.org/standard/63502.html> (accessed 5.04.2024).
- (23) Wohlleben, W.; Hellack, B.; Nickel, C.; Herrchen, M.; Hund-Rinke, K.; Kettler, K.; Riebeling, C.; Haase, A.; Funk, B.; Kühnel, D. The nanoGRAVUR framework to group (nano) materials for their occupational, consumer, environmental risks based on a harmonized set of material properties, applied to 34 case studies. *Nanoscale* **2019**, *11* (38), 17637-17654.
- (24) Wiemann, M.; Vennemann, A.; Sauer, U. G.; Wiench, K.; Ma-Hock, L.; Landsiedel, R. An in vitro alveolar macrophage assay for predicting the short-term inhalation toxicity of nanomaterials. *Journal of Nanobiotechnology* **2016**, *14* (1), 1-27, journal article. DOI: 10.1186/s12951-016-0164-2.
